# Supplementary material for: Estimating Grizzly and Black Bear Population Abundance and Trend in Banff National Park Using Noninvasive Genetic Sampling
Source: PubMed Central journal article supplement (PMC3342321; doi:10.1371/journal.pone.0034777), 2012-05-02
Supplement: pone.0034777.s005.pdf [file pone.0034777.s005.pdf]

**Table S4.** Model selection results from Pradel open population models of realized population growth rate ( $\lambda$ ) and apparent survival ( $\phi$ ) for grizzly bears in the Bow Valley of Banff National Park, Alberta, Canada between 2006 and 2008; results from Program MARK, April 2011 build.

| Model <sup>a</sup>                                                                                                   | AIC <sub>c</sub> <sup>b</sup> | $\Delta$ AIC <sub>c</sub> <sup>c</sup> | w <sub>i</sub> <sup>d</sup> | Model Likelihood | No. parameters | Deviance |
|----------------------------------------------------------------------------------------------------------------------|-------------------------------|----------------------------------------|-----------------------------|------------------|----------------|----------|
| $\phi(\text{sex}) \lambda(\text{sex}) p(t \times \text{sex} + \text{BRE}_{\text{full}} + \text{DTE})$                | 1079.53                       | 0.00                                   | 0.36                        | 1.00             | 36             | 995.53   |
| $\phi(\text{sex}) \lambda(\text{sex}) p(t \times \text{sex} + \text{BRE}_{\text{full}} + \text{DTE}); \text{MF10km}$ | 1079.53                       | 0.00                                   | 0.36                        | 1.00             | 36             | 995.53   |
| $\phi(\text{sex}) \lambda(\text{sex}) p(t \times \text{sex} + \text{BRE}_{\text{half}} + \text{DTE})$                | 1083.12                       | 3.59                                   | 0.06                        | 0.17             | 36             | 999.12   |
| $\phi(\text{sex}) \lambda(\text{sex}) p(t \times \text{sex} + \text{DTE})$                                           | 1083.46                       | 3.93                                   | 0.05                        | 0.14             | 33             | 1007.49  |
| $\phi(\text{sex}) \lambda(\text{sex}) p(t \times \text{sex} + \text{DTE}); \text{MF10km}$                            | 1083.46                       | 3.93                                   | 0.05                        | 0.14             | 33             | 1007.49  |
| $\phi(\text{sex}) \lambda(\text{sex}) p(t \times \text{sex} + \text{DTE}); \text{M10km, F5km}$                       | 1083.46                       | 3.93                                   | 0.05                        | 0.14             | 33             | 1007.49  |
| $\phi(\text{sex}) \lambda(\text{sex}) p(t \times \text{sex} + \text{DTE}); \text{MF5km}$                             | 1083.46                       | 3.93                                   | 0.05                        | 0.14             | 33             | 1007.49  |
| $\phi(\text{sex}) \lambda(\text{sex}) p(t \times \text{sex} \times \text{DTE})$                                      | 1086.09                       | 6.56                                   | 0.01                        | 0.04             | 34             | 1007.46  |
| $\phi(\text{sex}) \lambda(\text{sex}) p(t \times \text{sex} \times \text{DTE}); \text{M10km, F5km}$                  | 1086.09                       | 6.56                                   | 0.01                        | 0.04             | 34             | 1007.46  |
| $\phi(\text{sex}) \lambda(\text{sex}) p(t \times \text{sex})$                                                        | 1095.30                       | 15.77                                  | 0.00                        | 0.00             | 32             | 1021.96  |

<sup>a</sup> Models estimated sex-specific parameters,  $\phi$ ,  $\lambda$ , and bear rub capture probabilities ( $p$ ). Most models contained a covariate for the distance from each bear's detection center to the edge of grid (DTE); thresholds for DTE, if any, appear at the end of model names after a semicolon (M=males, F=females; km=kilometers). Some models contained an individual covariate for the number of bear rub days (BRE) located within each bear's idealized detection range each session. Parameter estimates derived from models with no covariates were similar to estimates from models with covariates for  $p$ .

<sup>b</sup> Akaike's Information Criterion for small sample sizes.

<sup>c</sup> The difference in AIC<sub>c</sub> value between the  $i$ th model and the model with the lowest AIC<sub>c</sub> value.

<sup>d</sup> Akaike wt used in model averaging.
